# Supplementary material for: Ecological impacts of large-scale disposal of mining waste in the deep sea
Source: PubMed Central journal article supplement (PMC4419517; doi:10.1038/srep09985), 2015-05-05

## Ecological impacts of large-scale disposal of mining waste in the deep sea

David J. Hughes, Tracy M. Shimmield, Kenneth D. Black & John A. Howe

### Supplementary Tables and Figures

#### Supplementary Table S1

Location and depth data for the benthic stations sampled off Lihir (L1-L6) and Misima (M1-M6), with the number of replicate corer drops used for biological sampling at each station.

| Station | Latitude     | Longitude     | Depth (m) | No. corer drops |
|---------|--------------|---------------|-----------|-----------------|
| L1      | 03° 06.200'S | 152° 40.540'E | 850       | 7               |
| L2      | 03° 07.000'S | 152° 46.370'E | 1750      | 5               |
| L3      | 03° 06.640'S | 152° 49.790'E | 2020      | 6               |
| L4      | 03° 08.260'S | 152° 30.880'E | 800       | 5               |
| L5      | 03° 00.360'S | 152° 26.070'E | 1715      | 3               |
| L6      | 02° 56.901'S | 152° 22.266'E | 2020      | 4               |
| M1      | 10° 44.500'S | 152° 51.242'E | 1380      | 3               |
| M2      | 10° 46.184'S | 152° 54.356'E | 1461      | 3               |
| M3      | 10° 47.280'S | 152° 56.210'E | 1467      | 6               |
| M4      | 10° 50.000'S | 152° 49.000'E | 1793      | 3               |
| M5      | 10° 58.561'S | 153° 40.943'E | 1704      | 3               |
| M6      | 10° 56.425'S | 152° 23.503'E | 1250      | 3               |

### Supplementary Table S2

Content of selected metals in sediments from stations east (L1-L3) and west (L4-L6) of Lihir. Data show solid-phase inventories ( $\text{g m}^{-2}$ ) summed over the 0-14 cm depth range for individual cores.

| Station | Depth (m) | Ca      | As   | Cu   | Pb  | Cd  |
|---------|-----------|---------|------|------|-----|-----|
| L1      | 850       | 8675.7  | 32.8 | 15.8 | 6.5 | 0.0 |
| L2      | 1750      | 3647.4  | 33.1 | 19.6 | 9.3 | 0.1 |
| L3      | 2020      | 16283.9 | 10.2 | 13.3 | 3.8 | 0.1 |
| L4      | 800       | 22887.3 | 1.5  | 8.7  | 0.6 | 0.0 |
| L5      | 1715      | 17577.7 | 1.2  | 5.4  | 0.7 | 0.0 |
| L6      | 2020      | 16768.7 | 0.8  | 6.0  | 0.7 | 0.0 |

### Supplementary Table S3

Higher-taxon composition of metazoan meiofaunal communities at stations east (L1-L3) and west (L4-L6) of Lihir. Data show mean ( $\pm$  SD) percentage total individuals ( $> 250 \mu\text{m}$ ) at each station, using corer drops as replicate samples.

| Station | Depth (m) | Nematoda        | Copepoda        | Ostracoda      | Others        |
|---------|-----------|-----------------|-----------------|----------------|---------------|
| L1      | 850       | 20.9 $\pm$ 22.9 | 70.3 $\pm$ 28.6 | 4.8 $\pm$ 12.6 | 4.0 $\pm$ 7.0 |
| L2      | 1750      | 2.4 $\pm$ 3.9   | 97.6 $\pm$ 3.9  | -              | -             |
| L3      | 2020      | 16.7 $\pm$ 40.8 | 83.3 $\pm$ 40.8 | -              | -             |
| L4      | 800       | 51.8 $\pm$ 8.9  | 40.0 $\pm$ 6.5  | 7.2 $\pm$ 3.2  | 1.0 $\pm$ 1.6 |
| L5      | 1715      | 41.1 $\pm$ 13.1 | 50.8 $\pm$ 6.5  | 5.4 $\pm$ 5.3  | 2.5 $\pm$ 2.3 |
| L6      | 2020      | 40.2 $\pm$ 8.0  | 49.2 $\pm$ 8.0  | 7.8 $\pm$ 3.2  | 2.9 $\pm$ 3.5 |

#### Supplementary Table S4

Content of selected metals in sediments from stations around Misima. Data show solid-phase inventories ( $\text{g m}^{-2}$ ) summed over the 0-10 cm depth range for individual cores.

| Station | Depth (m) | Ca      | As  | Cu   | Pb   | Cd  |
|---------|-----------|---------|-----|------|------|-----|
| M1      | 1380      | 3937.7  | 1.4 | 18.0 | 55.5 | 0.8 |
| M2      | 1461      | 3826.7  | 1.2 | 16.1 | 54.7 | 0.6 |
| M3      | 1467      | 4262.4  | 1.1 | 16.7 | 60.0 | 0.5 |
| M4      | 1793      | 14309.0 | 0.4 | 4.0  | 9.3  | 0.1 |
| M5      | 1704      | 22189.1 | 0.2 | 1.7  | 1.8  | 0.0 |
| M6      | 1250      | 19939.3 | 0.1 | 1.0  | 0.2  | 0.0 |

#### Supplementary Table S5

Higher-taxon composition of metazoan meiofaunal communities at stations around Misima. Data show mean ( $\pm$  SD) percentage total individuals ( $>250 \mu\text{m}$ ) at each station, using corer drops as replicate samples.

| Station | Depth (m) | Nematoda        | Copepoda        | Ostracoda       | Others        |
|---------|-----------|-----------------|-----------------|-----------------|---------------|
| M1      | 1380      | 28.9 $\pm$ 18.3 | 71.1 $\pm$ 18.3 | -               | -             |
| M2      | 1461      | 24.1 $\pm$ 10.1 | 52.0 $\pm$ 5.5  | 22.7 $\pm$ 13.4 | 1.3 $\pm$ 2.3 |
| M3      | 1467      | 59.7 $\pm$ 18.7 | 38.2 $\pm$ 18.8 | 2.2 $\pm$ 5.3   | -             |
| M4      | 1793      | 72.0 $\pm$ 2.7  | 23.0 $\pm$ 2.3  | 4.7 $\pm$ 1.7   | 0.3 $\pm$ 0.1 |
| M5      | 1704      | 72.3 $\pm$ 8.2  | 23.0 $\pm$ 6.8  | 4.5 $\pm$ 2.1   | 0.2 $\pm$ 0.4 |
| M6      | 1250      | 76.2 $\pm$ 2.7  | 21.4 $\pm$ 2.9  | 2.3 $\pm$ 0.3   | 0.1 $\pm$ 0.2 |

### Supplementary Table S6

Higher-taxon composition of macrofaunal communities around Misima. Data show mean ( $\pm$  SD) percentage total individuals ( $>250 \mu\text{m}$ ) at each station, using corer drops as replicate samples.

| Station | Depth (m) | Polychaeta      | Crustacea<br>Peracarida | Mollusca        | Echiura        | Others        |
|---------|-----------|-----------------|-------------------------|-----------------|----------------|---------------|
| M1      | 1380      | 43.2 $\pm$ 3.1  | 0.5 $\pm$ 0.8           | 35.5 $\pm$ 7.8  | 18.4 $\pm$ 4.0 | 2.4 $\pm$ 1.7 |
| M2      | 1461      | 72.8 $\pm$ 12.3 | -                       | 19.8 $\pm$ 10.3 | 1.1 $\pm$ 0.9  | 7.4 $\pm$ 2.0 |
| M3      | 1467      | 71.5 $\pm$ 8.6  | 2.1 $\pm$ 2.0           | 18.7 $\pm$ 9.3  | -              | 7.7 $\pm$ 3.7 |
| M4      | 1793      | 68.4 $\pm$ 7.2  | 11.3 $\pm$ 1.7          | 16.1 $\pm$ 5.8  | -              | 4.2 $\pm$ 1.0 |
| M5      | 1704      | 63.2 $\pm$ 10.6 | 16.9 $\pm$ 5.8          | 14.8 $\pm$ 6.4  | -              | 5.1 $\pm$ 1.8 |
| M6      | 1250      | 54.2 $\pm$ 0.2  | 24.2 $\pm$ 1.1          | 16.9 $\pm$ 0.4  | -              | 4.7 $\pm$ 0.7 |

### Supplementary Table S7

Family-level composition of polychaete communities around Misima. Data show mean ( $\pm$  SD) abundance (ind.  $\text{m}^{-2}$ ) at each station, using corer drops as replicate samples. The families listed are the five highest contributors to dissimilarity (SIMPER routine in Primer<sup>TM</sup> v.6) between the two station groups M1-M3 and M4-M6 recovered by cluster analysis (Fig. 6).

|    | Depth<br>(m) | Spionidae      | Paraonidae    | Syllidae      | Cirratulidae  | Lumbrineridae |
|----|--------------|----------------|---------------|---------------|---------------|---------------|
| M1 | 1380         | 147 $\pm$ 74   | 199 $\pm$ 27  | -             | 235 $\pm$ 74  | 211 $\pm$ 139 |
| M2 | 1461         | 242 $\pm$ 101  | 62 $\pm$ 35   | 11 $\pm$ 19   | 212 $\pm$ 97  | 632 $\pm$ 449 |
| M3 | 1467         | 286 $\pm$ 149  | 159 $\pm$ 126 | 18 $\pm$ 28   | 71 $\pm$ 68   | 492 $\pm$ 271 |
| M4 | 1793         | 983 $\pm$ 174  | 867 $\pm$ 349 | 311 $\pm$ 244 | 474 $\pm$ 196 | 244 $\pm$ 112 |
| M5 | 1704         | 393 $\pm$ 159  | 348 $\pm$ 72  | 122 $\pm$ 144 | 308 $\pm$ 87  | 37 $\pm$ 9    |
| M6 | 1250         | 1337 $\pm$ 168 | 914 $\pm$ 149 | 893 $\pm$ 141 | 952 $\pm$ 220 | 75 $\pm$ 11   |

**Supplementary Figure S1. Porewater concentrations of four ecotoxic trace metals in cores from four Misima stations.** Data points for each depth interval are mean values from replicate cores (n = 3) at each station. Error bars are omitted for clarity. No measurements were made at stations M2 or M5.

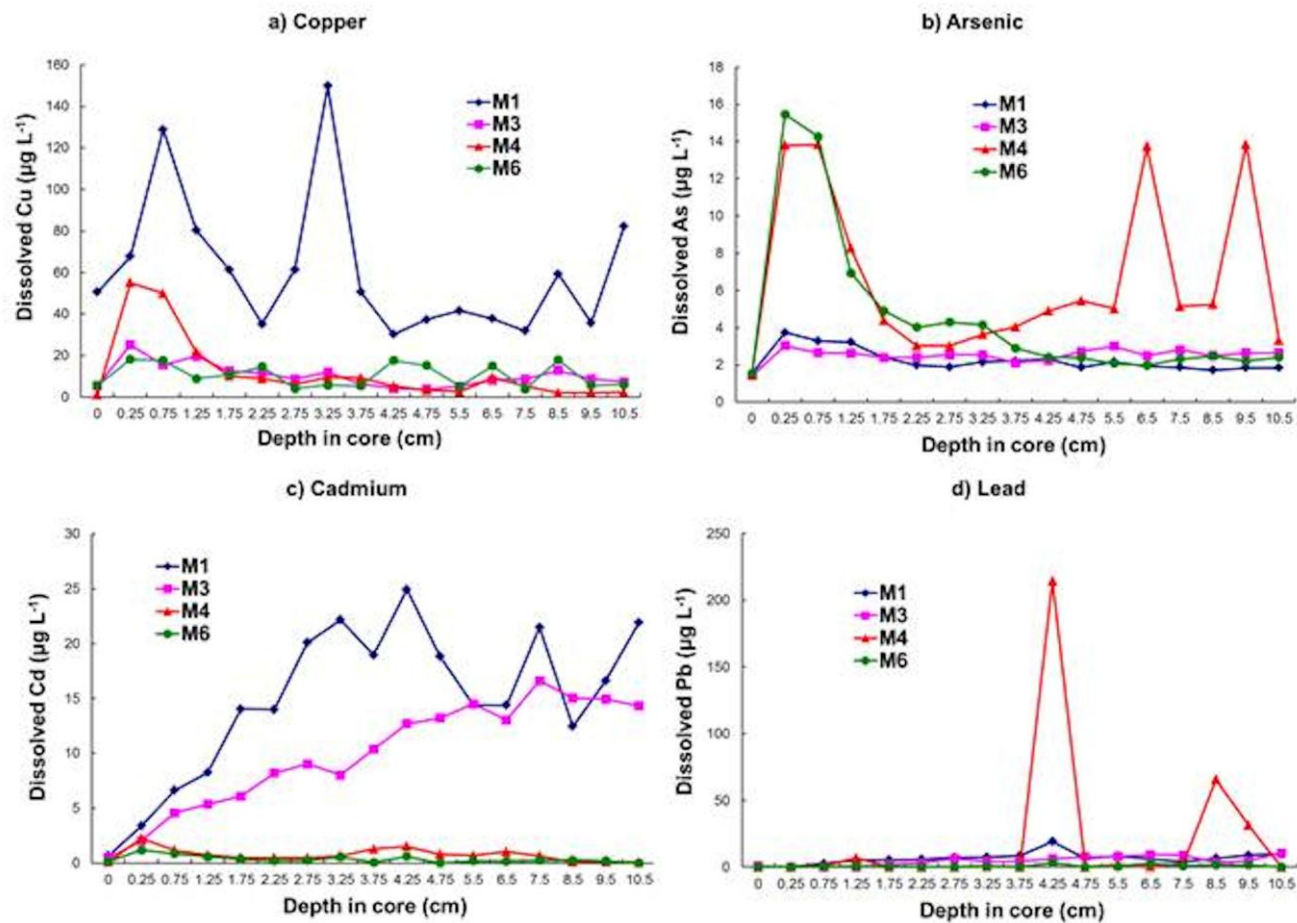

Supplement: srep09985-s1.pdf [file srep09985-s1.pdf]
